# Supplementary material
Source: PubMed Central journal article supplement (PMC4455210)
Supplement: CJN.08140814_CJN08140814SupplementaryData.pdf [file CJN.08140814_CJN08140814SupplementaryData.pdf]

Table S1. The Incidence (per 10,000 person-years) and hazard ratio of subdural hemorrhage in patients with end-stage renal disease by dialysis modality

| Variables      | The propensity score matched |       |                   |       |       |                   |                  | <i>p</i> -value <sup>b</sup> |
|----------------|------------------------------|-------|-------------------|-------|-------|-------------------|------------------|------------------------------|
|                | HD                           |       |                   | PD    |       |                   | HD to PD         |                              |
|                | Event                        | PY    | Rate <sup>a</sup> | Event | PY    | Rate <sup>a</sup> | HR<br>(95% CI)   |                              |
| Gender         |                              |       |                   |       |       |                   |                  | 0.37                         |
| Female         | 89                           | 27319 | 32.6              | 51    | 25331 | 20.1              | 1.86(0.97, 3.56) |                              |
| Male           | 69                           | 20123 | 34.3              | 44    | 18801 | 23.4              | 1.54(0.55, 2.43) |                              |
| Age, years     |                              |       |                   |       |       |                   |                  | 0.13                         |
| <50            | 39                           | 24266 | 16.1              | 23    | 22258 | 10.3              | 1.49(0.89, 2.49) |                              |
| 50-59          | 36                           | 11247 | 32.0              | 18    | 11091 | 16.2              | 1.89(1.07, 3.34) |                              |
| 60-69          | 56                           | 7219  | 77.6              | 30    | 6874  | 43.6              | 1.72(1.10, 2.69) |                              |
| 70+            | 27                           | 4711  | 57.3              | 24    | 3909  | 61.4              | 0.94(0.54, 1.64) |                              |
| Comorbidity    |                              |       |                   |       |       |                   |                  |                              |
| CAD            |                              |       |                   |       |       |                   |                  | 0.16                         |
| No             | 112                          | 38458 | 29.1              | 55    | 36257 | 15.2              | 2.04(1.25, 3.33) |                              |
| Yes            | 46                           | 8984  | 51.2              | 40    | 7875  | 50.8              | 1.00(0.35, 2.85) |                              |
| CHF            |                              |       |                   |       |       |                   |                  | 0.78                         |
| No             | 125                          | 40547 | 30.8              | 70    | 38315 | 18.3              | 1.89(1.25, 2.84) |                              |
| Yes            | 33                           | 6896  | 47.9              | 25    | 5817  | 43.0              | 3.67(1.02, 13.1) |                              |
| Stroke         |                              |       |                   |       |       |                   |                  | 0.71                         |
| No             | 130                          | 44264 | 29.4              | 79    | 41387 | 19.1              | 1.62(1.12, 2.33) |                              |
| Yes            | 28                           | 3178  | 88.1              | 16    | 2745  | 58.3              | 3.00(0.61, 14.9) |                              |
| Hyperlipidemia |                              |       |                   |       |       |                   |                  | 0.51                         |
| No             | 74                           | 29981 | 24.7              | 49    | 27724 | 17.7              | 1.43(0.82, 2.50) |                              |
| Yes            | 84                           | 17462 | 48.1              | 46    | 16409 | 28.0              | 2.00(0.97, 4.12) |                              |
| Hypertension   |                              |       |                   |       |       |                   |                  | 0.72                         |
| No             | 7                            | 6188  | 11.3              | 10    | 6242  | 16.0              | 0.72(0.27, 1.89) |                              |
| Yes            | 151                          | 41254 | 36.6              | 85    | 37892 | 22.4              | 1.56(1.19, 2.04) |                              |
| Diabetes       |                              |       |                   |       |       |                   |                  | 0.58                         |
| No             | 79                           | 34003 | 23.2              | 51    | 32161 | 15.9              | 1.47(0.92, 2.33) |                              |
| Yes            | 79                           | 13440 | 58.8              | 44    | 11971 | 36.8              | 1.80(1.04, 3.11) |                              |
| Dementia       |                              |       |                   |       |       |                   |                  | 0.99                         |
| No             | 155                          | 47096 | 32.9              | 92    | 43856 | 21.0              | 1.52(1.17, 1.97) |                              |
| Yes            | 3                            | 346   | 86.7              | 3     | 276   | 108.6             | 0.73(0.15, 3.65) |                              |
| AF             |                              |       |                   |       |       |                   |                  | 0.99                         |
| No             | 153                          | 46804 | 32.7              | 91    | 43479 | 20.9              | 1.51(1.16, 1.95) |                              |

|             |     |       |      |    |       |      |                  |      |
|-------------|-----|-------|------|----|-------|------|------------------|------|
| Yes         | 5   | 638   | 78.4 | 4  | 653   | 61.2 | 1.33(0.36, 4.99) |      |
| Medication  |     |       |      |    |       |      |                  |      |
| Warfarin    |     |       |      |    |       |      |                  | 0.49 |
| No          | 154 | 46264 | 33.3 | 91 | 43066 | 21.1 | 1.53(1.18, 1.98) |      |
| Yes         | 4   | 1179  | 33.9 | 4  | 1067  | 37.5 | 0.93(0.23, 3.73) |      |
| Clopidogrel |     |       |      |    |       |      |                  | 0.67 |
| No          | 142 | 44677 | 31.8 | 81 | 41556 | 19.5 | 1.73(1.19, 2.50) |      |
| Yes         | 16  | 2765  | 57.9 | 14 | 2576  | 54.3 | 2.00(0.50, 8.00) |      |
| Aspirin     |     |       |      |    |       |      |                  | 0.07 |
| No          | 50  | 23524 | 21.3 | 25 | 22045 | 11.3 | 3.67(1.49, 9.04) |      |
| Yes         | 108 | 23918 | 45.2 | 70 | 22087 | 31.7 | 1.30(0.81, 2.09) |      |

Abbreviations: HD, hemodialysis; PD, peritoneal dialysis; HR, hazard ratio; CAD, coronary artery disease; CHF, congestive heart failure; AF, atrial fibrillation.

<sup>a</sup> Rate, incidence rate ,per 10000 person-years, <sup>b</sup> p-value for interaction.
